# Supplementary material for: Development of an oral swab based microbiome test for the detection of feline dental disease
Source: bioRxiv or medRxiv preprint supplement (doi:10.1101/2021.04.23.441192), 2021-04-26

Supplementary figure 1

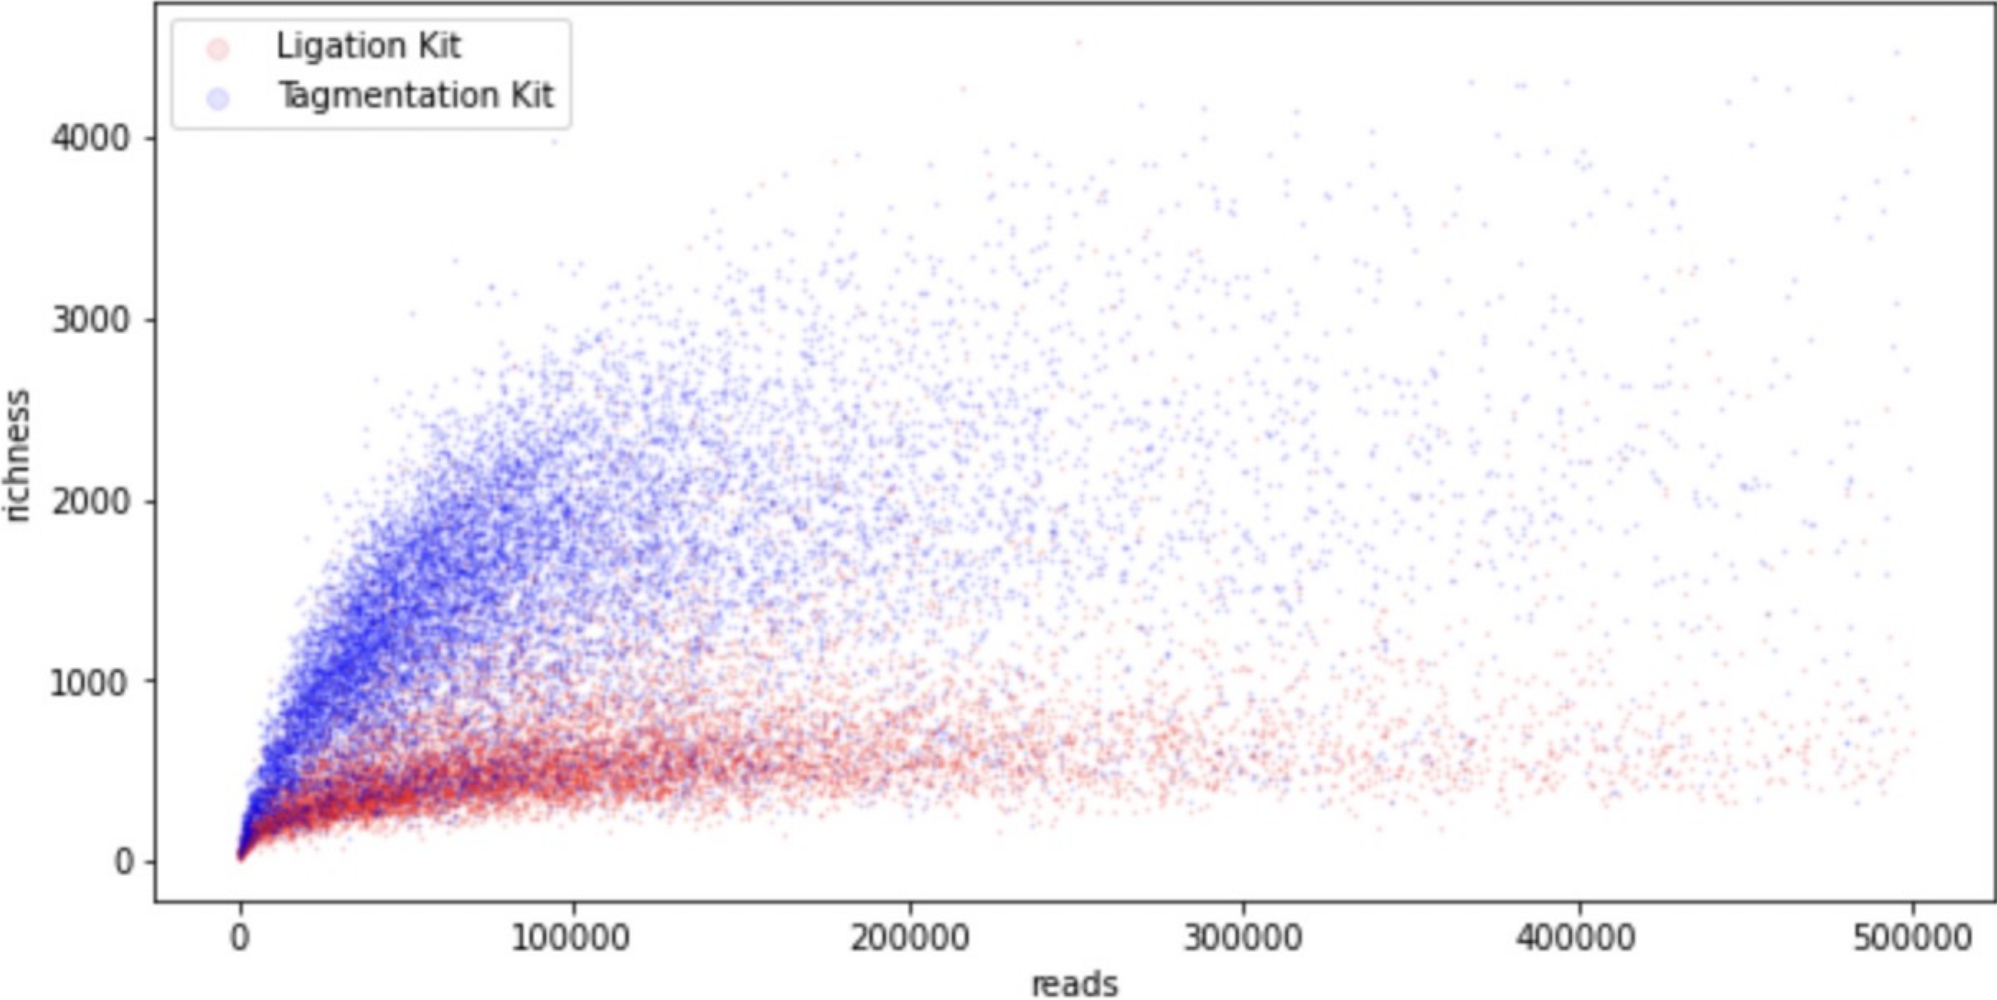

Supplement: Supplementary file [file media-1.pdf]
